# Supplementary material for: Measurement of the continuous distribution of binding sites in molecularly imprinted polymers
Source: Royal Society of Chemistry journal article supplement (doi:10.1039/b002354j), 2000-01-01
Supplement: figures.doc [file figures.doc]

**Supplementary Materials**

**Scatchard Plot 1**

Polymer **1** (*F* = 0.0025 mM to 4.1 mM)

Scatchard Plots were calculated by a linear least squares fit through the first five and last five points.

**Scatchard Plot 2**

Polymer **1** (*F* = 0.041 mM to 0.61 mM)

The experimental isotherms (*B* vs log *F*) were fitted with a smooth spline. The smoothing factor was selected based upon the experimental error.[[1]](#footnote-2) The *y*-axis (*B*) is shown in a log format, which allows better assessment of the fit at lower concentrations.

Binding Isotherm for Polymer **1** (*S* = 0.01)

Binding Isotherm for Polymer **2** (*S* = 0.2)

Binding Isotherm for Polymer **3** (*S* = 1.7)

1. Hunston, D. L. *Anal. Biochem.* **1975**, *63*, 99-109. [↑](#footnote-ref-2)
